# Supplementary material for: Machine learning-based cluster analysis of immune cell subtypes and breast cancer survival
Source: PubMed Central journal article supplement (PMC10624674; doi:10.1038/s41598-023-45932-4), 2023-11-03
Supplement: 41598_2023_45932_MOESM1_ESM.pdf [file 41598_2023_45932_MOESM1_ESM.pdf]

# Machine learning-based cluster analysis of immune cell subtypes and breast cancer survival

Zhanwei Wang<sup>1</sup>, Dionyssios Katsaros<sup>2</sup>, Junlong Wang<sup>1,3</sup>, Nicholetta Biglio<sup>4</sup>, Brenda Y. Hernandez<sup>1</sup>, Peiwen Fei<sup>5</sup>, Lingeng Lu<sup>6</sup>, Harvey Risch<sup>6</sup>, Herbert Yu<sup>1,\*</sup>

1. Cancer Epidemiology Program, University of Hawaii Cancer Center, Honolulu, Hawaii
2. Department of Surgical Sciences, Gynecology, AOU Città della Salute, University of Torino, Turin, Italy
3. Department of Molecular Biosciences & Bioengineering, University of Hawaii at Manoa, Honolulu, Hawaii
4. Department of Surgical Sciences, Division of Obstetrics and Gynecology, University of Torino School of Medicine, Mauriziano Hospital, Turin, Italy
5. Cancer Biology Program, University of Hawaii Cancer Center, Honolulu, Hawaii
6. Department of Chronic Disease Epidemiology, Yale School of Public Health, New Haven, Connecticut

Corresponding author:  
Herbert Yu, MD, PhD  
University of Hawaii Cancer Center  
701 Ilalo Street, Honolulu, HI 96813  
Email: [hyu@cc.hawaii.edu](mailto:hyu@cc.hawaii.edu)

Supplementary Figure 1. Heatmap to show the results of unsupervised hierarchical clustering analysis using heatmap.2 function from gplots package in R (version 4.0.3). Y-axis: immune cell subtypes. X-axis: tumor samples; red – high abundance of cell type; green – low abundance of cell type; Bottom bar (hcluster): cell cluster; red – Cluster B; green – Cluster A.

Supplementary Figure 2. Receiver operating characteristics (ROC) curves and areas under the curve (AUC) when comparing cell cluster results of unsupervised hierarchical clustering (UHC) with random forest (RF), deep neural network (DNN), elastic net, and stepAIC in the METABRIC training and METABRIC testing sets.

Supplementary Figure 3. Assessment of cell type importance in random forest analysis by mean decreases in accuracy and the Gini coefficient.

Supplementary Figure 4. A. The ingenuity pathway analysis (IPA, [www.qiagen.com/ingenuity](http://www.qiagen.com/ingenuity)) graphical summary of DEGs from METABRIC; B. IPA graphical summary of DEGs from TCGA.

Supplementary Figure 1.

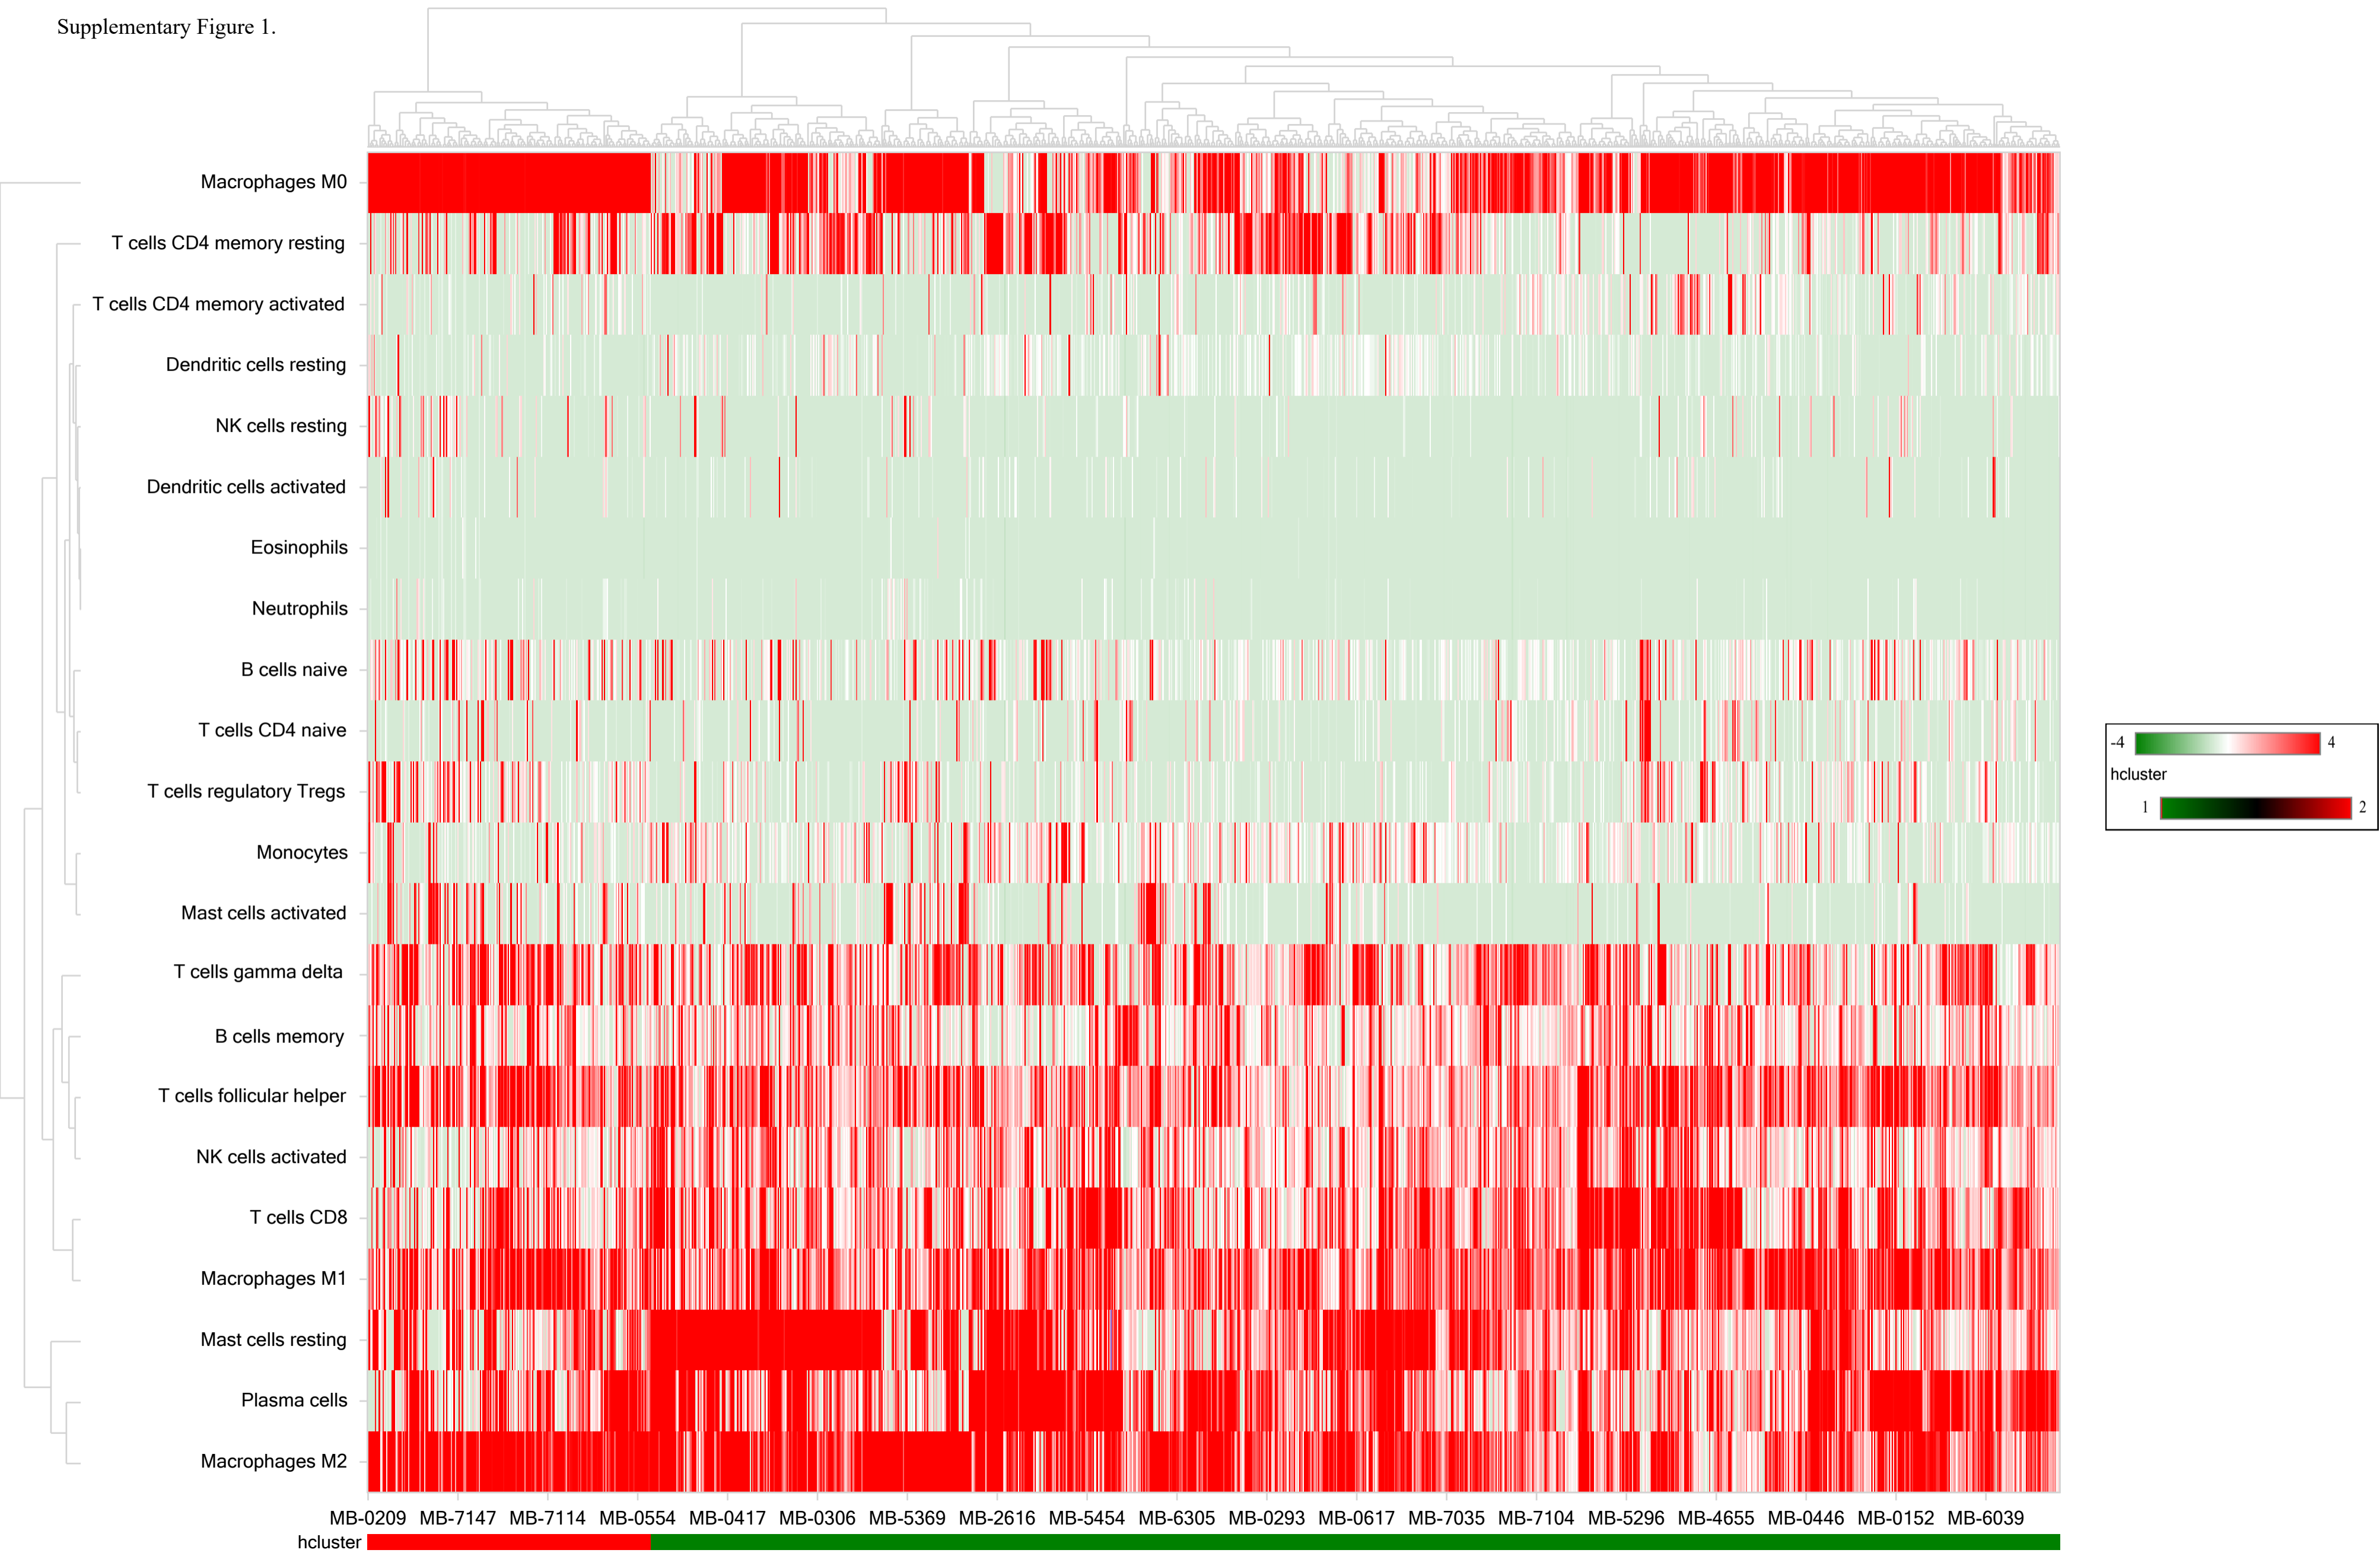

Supplementary Figure 2

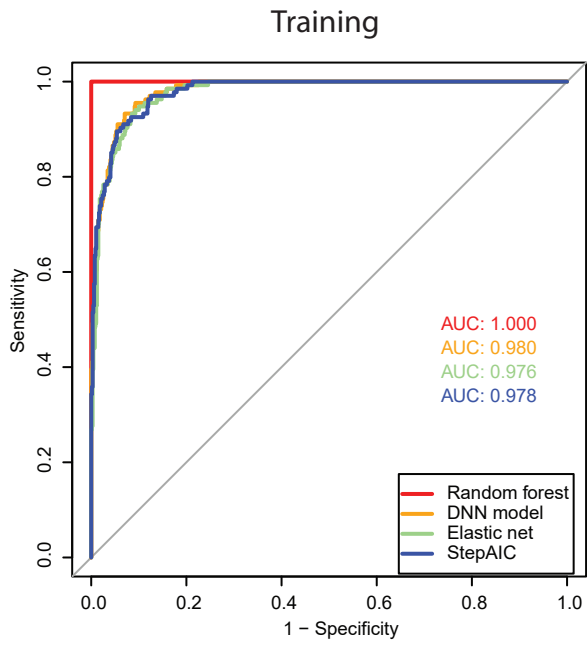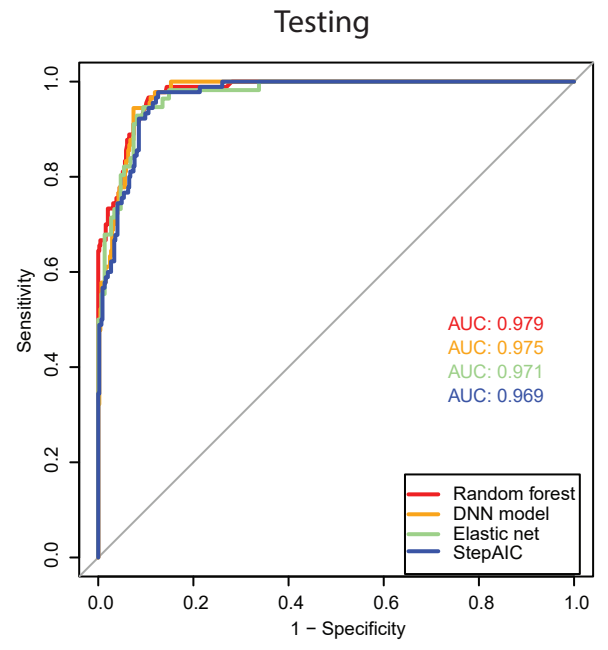

Supplementary Figure 3.

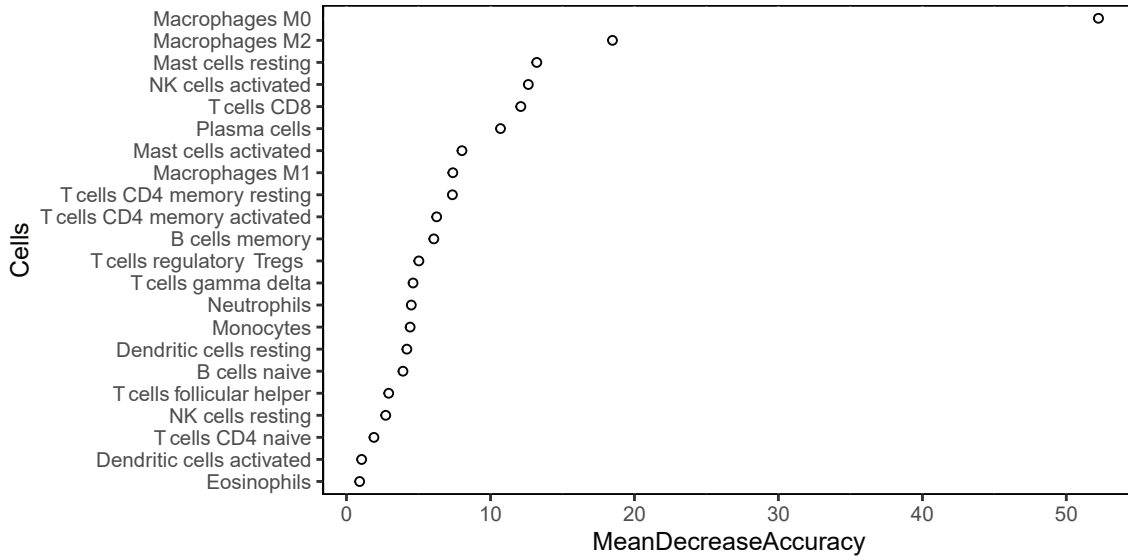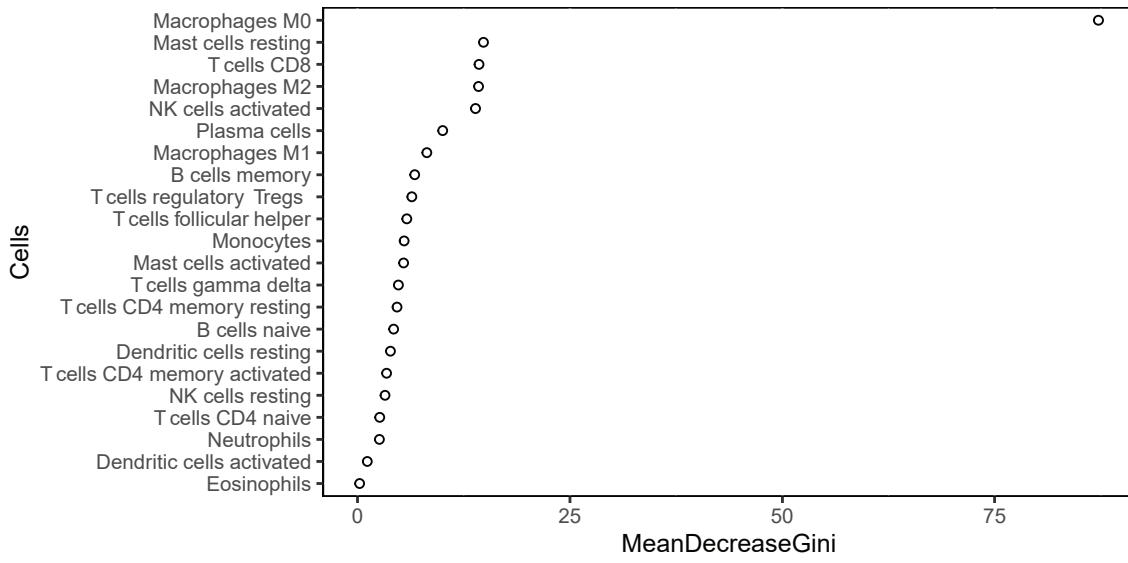

# Supplementary Figure 4

A

## Metabric

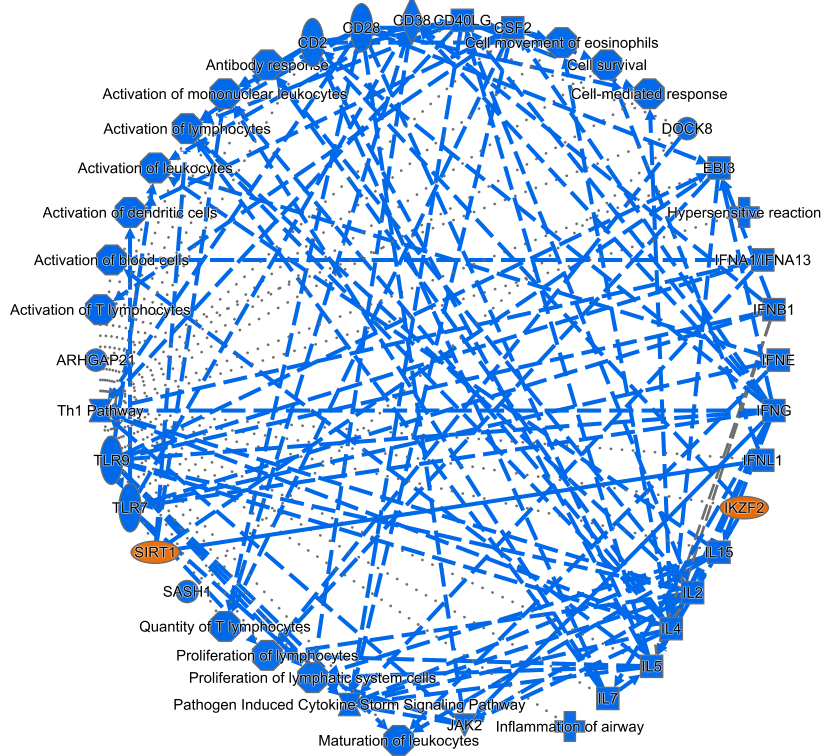

B

## TCGA

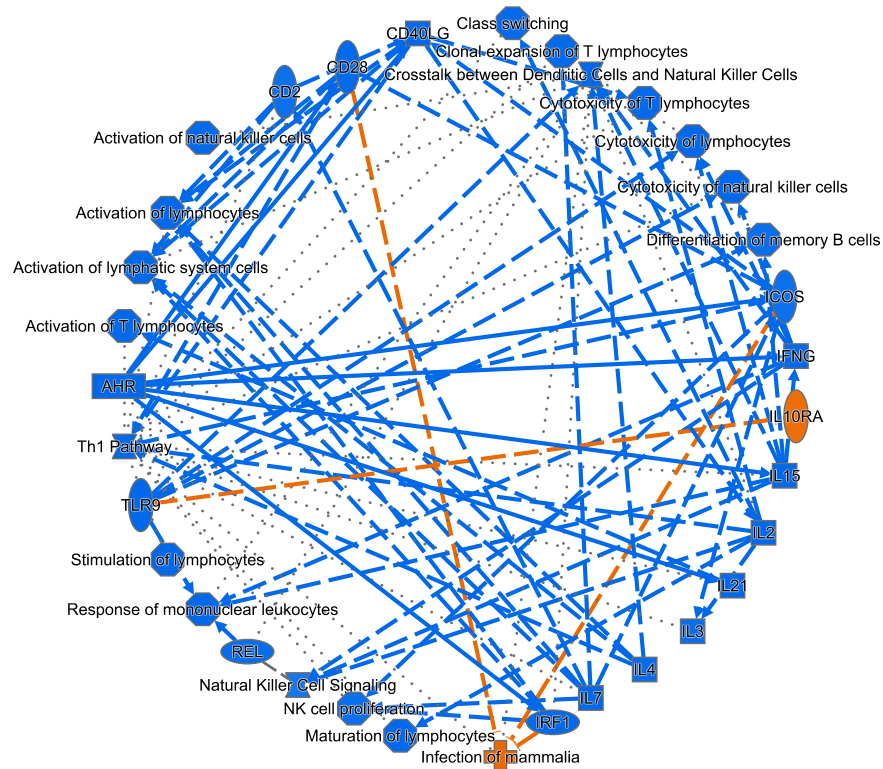

**Supplementary Table 1. Elastic net and stepAIC regression models for predicting immune cell subtype clusters in METABRIC**

| <b>Elastic net model</b>     |                    | <b>stepAIC model</b>         |                    |
|------------------------------|--------------------|------------------------------|--------------------|
| <b>Variable</b>              | <b>coefficient</b> | <b>Variable</b>              | <b>coefficient</b> |
| (Intercept)                  | -5.2176564         | (Intercept)                  | 24.845             |
| B cells naive                | -1.6929311         | B cells naive                | -49.827            |
| B cells memory               | -1.3572613         | B cells memory               | -43.861            |
| Plasma cells                 | -1.8340779         | Plasma cells                 | -37.108            |
| T cells CD8                  | -2.9320872         | T cells CD8                  | -39.66             |
| T cells CD4 memory resting   | 4.855054           | T cells CD4 naive            | -23.216            |
| T cells CD4 memory activated | -7.2425466         | T cells CD4 memory resting   | -15.199            |
| T cells regulatory Tregs     | -1.9584155         | T cells CD4 memory activated | -56.705            |
| NK cells activated           | -2.0833505         | T cells follicular helper    | -29.84             |
| Macrophages M0               | 18.1484351         | T cells regulatory Tregs     | -41.416            |
| Macrophages M2               | -0.4273408         | T cells gamma delta          | -32.255            |
| Mast cells resting           | -2.3535755         | NK cells resting             | -46.437            |
| Mast cells activated         | 1.6185543          | NK cells activated           | -35.993            |
| Neutrophils                  | -20.4136521        | Monocytes                    | -33.832            |
|                              |                    | Macrophages M1               | -31.136            |
|                              |                    | Macrophages M2               | -38.52             |
|                              |                    | Dendritic cells resting      | -46.944            |
|                              |                    | Mast cells resting           | -36.848            |
|                              |                    | Mast cells activated         | -22.208            |
|                              |                    | Neutrophils                  | -127.257           |

## R code:

```
library(factoextra)
library(caret)
library(caTools)
library(randomForest)
library(ROCR)
library(survcomp)

#Import METABRIC data
METABRIC.ori<-read.csv("./metabric_cibersort_100perm.csv", header=TRUE)
METABRIC.sub <- subset(METABRIC.ori, P.value < 0.05)
METABRIC<-METABRIC.sub[,c(2:23)]

#Cluster in METABRIC
METABRIC.dist<- dist(METABRIC, method="euclidean")
METABRIC.clust<-hclust(METABRIC.dist, method = "complete")
plot(METABRIC.clust,hang = -1)
out.METABRIC.clust.id<- cutree(METABRIC.clust, k=2)
table(out.METABRIC.clust.id)
METABRIC.sub$hcluster<-out.METABRIC.clust.id
table(METABRIC.sub$hcluster)

#Split METABRIC into training and testing datasets
set.seed(123456)
sample = sample.split(METABRIC$hcluster, SplitRatio = 0.6)
train = subset(METABRIC, sample == TRUE)
test = subset(METABRIC, sample == FALSE)

#Build Random Forest model in training data
train$hcluster<- as.factor(train$hcluster)
set.seed(2)
rf<-randomForest(hcluster~., data=train, importance=TRUE, proximity= TRUE)
importance(rf)
```



```

plot(rf)
par(family="serif", cex=1.1,font=2, cex.lab=1.1, font.lab=1, cex.axis=1.1, font.axis=1 )
varImpPlot(rf)
#Draw ROC for training data
train.predict <- predict(rf, train[-23], type="prob")
pred_train_rf = prediction(train.predict[,2],train$hcluster)
perf_train = performance(pred_train_rf,"tpr","fpr")
plot(perf_train, col='blue',lty=2)
auc <- performance(pred_train_rf,'auc')
auc = unlist(slot(auc,"y.values"))
plot(perf_train,
      xlim=c(0,1), ylim=c(0,1),col='red',
      main=paste("ROC curve (", "AUC = ",auc,")"),
      lwd = 2, cex.main=1.3, cex.lab=1.2, cex.axis=1.2, font=1.2)
abline(0,1)
#Draw ROC for testing data
test.predict <- predict(rf, test[-23], type="prob")
pred_test_rf = prediction(test.predict[,2],test$hcluster)
perf_test = performance(pred_test_rf,"tpr","fpr")
plot(perf_test, col='blue',lty=2)
auc <- performance(pred_test_rf,'auc')
auc = unlist(slot(auc,"y.values"))
plot(perf_test,
      xlim=c(0,1), ylim=c(0,1),col='red',
      main=paste("ROC curve (", "AUC = ",auc,")"),
      lwd = 2, cex.main=1.3, cex.lab=1.2, cex.axis=1.2, font=1.2)
abline(0,1)
# KM plot for METABRIC data
OS<-METABRIC.sub$OS
death<-METABRIC.sub$death

```

```
RFS<-METABRIC.sub$RFS
```

```
relapse<-METABRIC.sub$Relapse
```

```
hcluster<-METABRIC.sub$hcluster
```

```
data.os<-data.frame("surv.time"=as.vector(death/12), "surv.event"=as.vector(OS),  
  "strat"=as.vector(hcluster))
```

```
km.coxph.plot(formula.s=Surv(surv.time, surv.event) ~ strat, data.s=data.os,  
  x.label="Time (years)", y.label="OS",  
  main.title="", leg.text=paste(c("hcluster_1", "hcluster_2"), "", sep=""),  
  leg.pos="bottomleft", leg.inset=F, .col=c("blue", "red"), leg.bty="n",  
  .lty=c(1,1), .lwd=c(3,3), show.n.risk=TRUE, n.risk.step=3, n.risk.cex=0.8, verbose=F)
```

```
data.dfs<-data.frame("surv.time"=as.vector(relapse/12), "surv.event"=as.vector(RFS),  
  "strat"=as.vector(hcluster))
```

```
km.coxph.plot(formula.s=Surv(surv.time, surv.event) ~ strat, data=data.dfs,  
  x.label="Time (years)", y.label="DFS",  
  main.title="", leg.text=paste(c("hcluster_1", "hcluster_2"), "", sep=""),  
  leg.pos="bottomleft", leg.inset=F, .col=c("blue", "red"), leg.bty="n",  
  .lty=c(1,1), .lwd=c(3,3), show.n.risk=TRUE, n.risk.step=3, n.risk.cex=0.8, verbose=F)
```

```
# Univariate analysis in TCGA
```

```
coxph(Surv(relapse, RFS==1)~hcluster)
```

```
coxph(Surv(death, OS==1)~hcluster)
```

```
# Multivariate COX regression analysis in METABRIC data
```

```
fit_RFS <- coxph(formula = Surv(relapse, RFS == 1) ~ Age + as.factor(ER) + as.factor(PR) +  
  as.factor(Grade) + as.factor(Stage) + hcluster, data = METABRIC.sub)
```

```
summary(fit_RFS)
```

```
fit_os <- coxph(formula = Surv(death, OS == 1) ~ Age + as.factor(ER) + as.factor(PR) + as.factor(Grade) +  
  as.factor(Stage) + hcluster, data = METABRIC.sub)
```

```

summary(fit_os)

# Apply RF model to TCGA data

tcga_predict_class <- predict(rf, tcga_ciber_sub[,c(3:24)], type="class")
tcga_ciber_sub$rf_predi_class <- tcga_predict_class

#KM plot for TCGA data
RFS<-as.numeric(tcga_ciber_sub$DFS)
relapse<-tcga_ciber_sub$Disease_Free
rf_predi_class<-tcga_ciber_sub$rf_predi_class
OS<-as.numeric(tcga_ciber_sub$OS)
death<-tcga_ciber_sub$Overall

data.test<-data.frame("surv.time"=as.vector(relapse/12), "surv.event"=as.vector(RFS),
                      "strat"=as.vector(rf_predi_class))

km.coxph.plot(formula.s=Surv(surv.time, surv.event) ~ strat, data.s=data.test,
              x.label="Time (years)", y.label="RFS",
              main.title="", leg.text=paste(c("Cluster 1", "Cluster 2"), "", sep=""),
              leg.pos="topright", leg.inset=F, .col=c("blue", "red"), leg.bty="n",
              .lty=c(1,1), .lwd=c(3,3), show.n.risk=TRUE, n.risk.step=1, n.risk.cex=1, verbose=F, xlim = c(0,16))

data.test<-data.frame("surv.time"=as.vector(death/12), "surv.event"=as.vector(OS),
                      "strat"=as.vector(rf_predi_class))

km.coxph.plot(formula.s=Surv(surv.time, surv.event) ~ strat, data.s=data.test,
              x.label="Time (years)", y.label="OS",
              main.title="", leg.text=paste(c("Cluster 1", "Cluster 2"), "", sep=""),
              leg.pos="topright", leg.inset=F, .col=c("blue", "red"), leg.bty="n",
              .lty=c(1,1), .lwd=c(3,3), show.n.risk=TRUE, n.risk.step=1, n.risk.cex=1, verbose=F)

# Univariate analysis in TCGA
fit_DFS <- coxph(Surv(Disease_Free, DFS==1) ~ rf_predi_class, data = tcga_ciber_sub)
summary(fit_DFS)

fit_os <- survfit(Surv(Overall, OS) ~ predi_class, data, data = tcga_ciber_sub)

```

```
summary(fit_os)
```

```
# Multivariate COX regression analysis in TCGA
```

```
tcga_ciber_sub$ER <- as.factor(tcga_ciber_sub$ER)
```

```
tcga_ciber_sub$PR <- as.factor(tcga_ciber_sub$PR)
```

```
tcga_ciber_sub$Stage <- as.factor(tcga_ciber_sub$Stage)
```

```
tcga_ciber_sub$Histology <- as.factor(tcga_ciber_sub$Histology)
```

```
tcga_ciber_sub$rf_predi_class <- as.factor(tcga_ciber_sub$rf_predi_class)
```

```
fit_DFS <- coxph(Surv(Disease_Free,DFS==1) ~ Age + ER +PR + Stage + Histology + rf_predi_class, data =  
tcga_ciber_sub)
```

```
summary(fit_DFS)
```

```
fit_os <- coxph(Surv(Overall,OS==1) ~ Age + ER +PR + Stage + Histology + rf_predi_class, data =  
tcga_ciber_sub)
```

```
summary(fit_os)
```

```
# Apply RF model to Turin data
```

```
new_bc.predict_class <- predict(rf, new_bc[,c(1:22)], type="class")
```

```
new_bc_k_cluster$rf_predi_class <- new_bc.predict_class
```

```
#KM plot in Turin data
```

```
RFS<-as.numeric(new_bc_k_cluster$Relapse)
```

```
relapse<-new_bc_k_cluster$DFS
```

```
OS<-as.numeric(new_bc_k_cluster$Death)
```

```
death<-new_bc_k_cluster$OS
```

```
rf_predi_class<-new_bc_k_cluster$rf_predi_class
```

```
data.dfs<-data.frame("surv.time"=as.vector(relapse/12), "surv.event"=as.vector(RFS),  
"strat"=as.vector(rf_predi_class))
```

```
km.coxph.plot(formula.s=Surv(surv.time, surv.event) ~ strat, data=data.dfs,
```

```
  x.label="Time (years)", y.label="DFS",
```

```
  main.title="", leg.text=paste(c("RF_predi_class_1","RF_predi_class_2"),"", sep=""),
```

```
  leg.pos="bottomleft", leg.inset=F, .col=c("blue","red"),leg.bty="n",
```

```
  .lty=c(1,1),.lwd=c(3,3),show.n.risk=TRUE, n.risk.step=3, n.risk.cex=0.8, verbose=F)
```

```
data.os<-data.frame("surv.time"=as.vector(death/12), "surv.event"=as.vector(OS),  
  "strat"=as.vector(rf_predi_class))
```

```
km.coxph.plot(formula.s=Surv(surv.time, surv.event) ~ strat, data.s=data.os,  
  x.label="Time (years)", y.label="OS",  
  main.title="", leg.text=paste(c("RF_predi_class_1","RF_predi_class_2"),"", sep=""),  
  leg.pos="bottomleft", leg.inset=F, .col=c("blue","red"),leg.bty="n",  
  .lty=c(1,1),.lwd=c(3,3),show.n.risk=TRUE, n.risk.step=3, n.risk.cex=0.8, verbose=F)
```

```
# Univariate analysis in Turin data
```

```
RFS<-as.numeric(new_bc_k_cluster$Relapse)
```

```
relapse<-new_bc_k_cluster$DFS
```

```
OS<-as.numeric(new_bc_k_cluster$Death)
```

```
death<-new_bc_k_cluster$OS
```

```
coxph(Surv(DFS,Relapse==1) ~rf_predi_class, data = new_bc_k_cluster)
```

```
coxph(Surv(OS,Death==1) ~ rf_predi_class, data = new_bc_k_cluster)
```

```
# Multivariate COX regression analysis in TCGA
```

```
new_bc_k_cluster$E2grp <- as.factor(new_bc_k_cluster$E2grp)
```

```
new_bc_k_cluster$PGgrp <- as.factor(new_bc_k_cluster$PGgrp)
```

```
new_bc_k_cluster$stage_3_grp <- as.factor(new_bc_k_cluster$stage_3_grp)
```

```
new_bc_k_cluster$GRADE <- as.factor(new_bc_k_cluster$GRADE)
```

```
new_bc_k_cluster$nhist <- as.factor(new_bc_k_cluster$nhist)
```

```
new_bc_k_cluster$rf_predi_class <- as.factor(new_bc_k_cluster$rf_predi_class)
```

```
fit_relapse <- coxph(Surv(DFS,Relapse==1) ~ AgeNew + E2grp + PGgrp + stage_3_grp + GRADE + nhist +  
rf_predi_class, data = new_bc_k_cluster)
```

```
summary(fit_relapse)
```

```
fit_death <- coxph(Surv(OS,Death==1) ~ AgeNew + E2grp + PGgrp + stage_3_grp + GRADE + nhist +  
hcluster, data = new_bc_k_cluster)
```

```
summary(fit_death)
```
